# Supplementary material
Source: Springer Nature journal article supplement (https://www.springermedizin.de/resource/supplementary/13063_2011_696_MOESM2_ESM.pdf/9618498)
Supplement: MOESM2 [file 9618498]

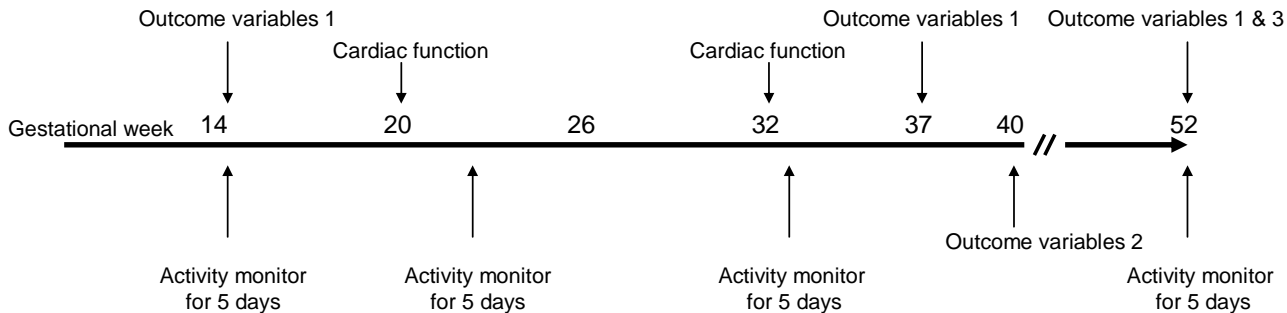

### Outcome variables 1

Cardiac function  
 Peak oxygen uptake  
 Endothelial function  
 Blood and urinary samples  
 Oral glucose tolerance  
 Height  
 Weight  
 Waist  
 Skinfold thickness (in pregnancy)  
 Dual-emission X-ray absorptiometry (post partum)  
 Lumbopelvic pain  
 Blood pressure  
 Pelvic floor muscle assessment  
 Questionnaires

### Outcome variables 2

Cardiac function  
 Umbilical cord blood samples  
 Weight  
 Blood pressure  
 Delivery mode  
 Potential complications at delivery

### Offspring variables:

Birth weight  
 Birth length  
 Head circumference  
 Skinfold thickness  
 Upper-arm- and mid-abdominal circumference  
 Apgar score at one and five minutes  
 Blood pressure  
 Need for extra oxygen  
 Transfer to neonatal intensive care unit  
 Diagnosis

### Outcome variables 3

#### Offspring variables:

Weight  
 Length  
 Head circumference  
 Skinfold thickness  
 Upper-arm- and mid-abdominal circumference  
 Blood pressure  
 Diagnosis
